# Supplementary material for: Remote Management of Poststroke Patients With a Smartphone-Based Management System Integrated in Clinical Care: Prospective, Nonrandomized, Interventional Study
Source: PubMed Central journal article supplement (PMC7068458; doi:10.2196/15377), 2020-02-27
Supplement: jmir_v22i2e15377_app1.pdf [file jmir_v22i2e15377_app1.pdf]

# Multimedia Appendix 1. Screenshots of the intervention

## Self-testing of stroke symptoms

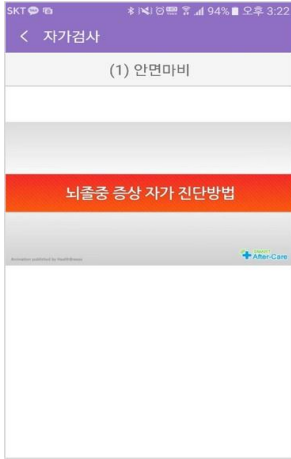

## Registration of medication intake

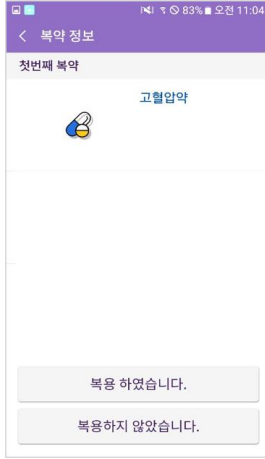

## Stroke education: post-stroke home-rehabilitation

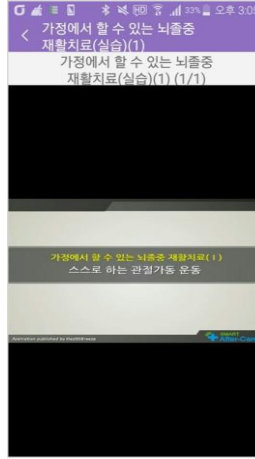

## Stroke education: daily newsfeed

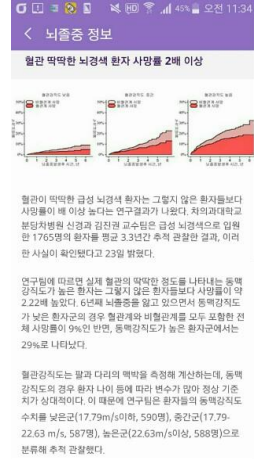

## Exercise program : evaluation after exercise

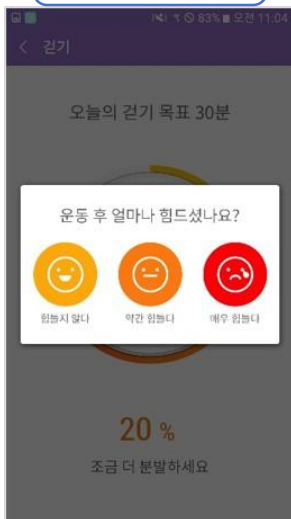

## Exercise program : Instructions for stretching

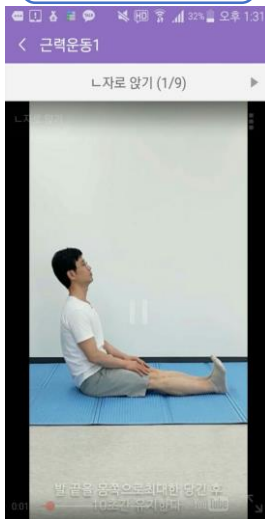

## Exercise program : Alarm for too slow walking speed

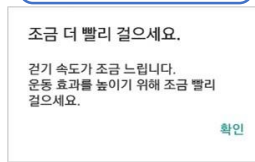

## Weekly report for participants

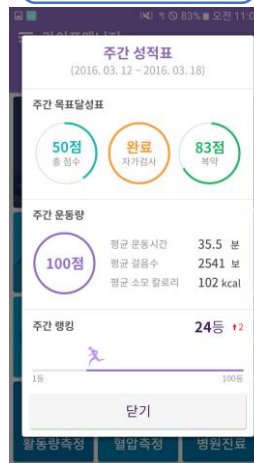

## Exercise program : Summary of walking steps (green), consumed calories (red), walking distance (blue)

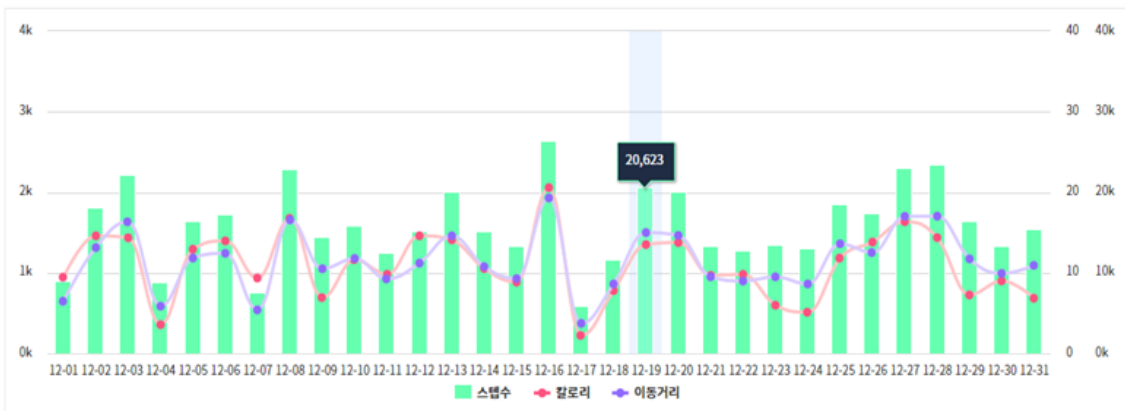

**Smart Band and exercise program:  
walking mode screenshot**

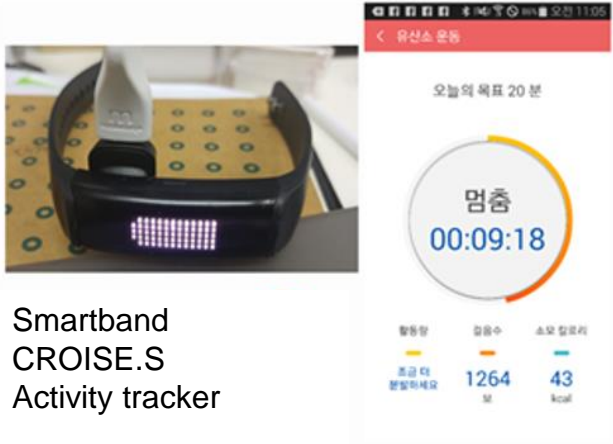

Smartband  
CROISE.S  
Activity tracker

**Sphyngomanometer and  
blood pressure screenshot**

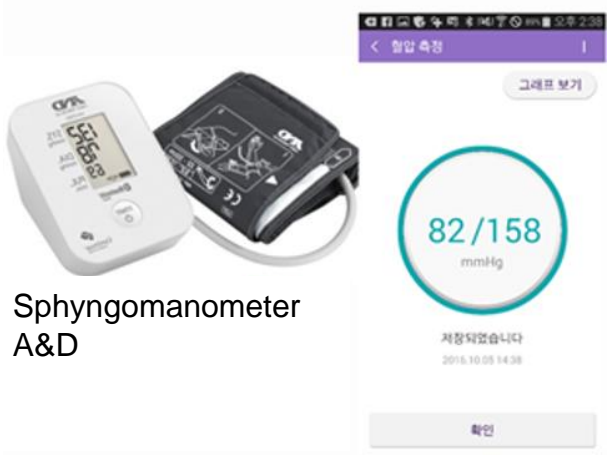

Sphyngomanometer  
A&D

**Glucose meter and  
blood glucose saving screenshot**

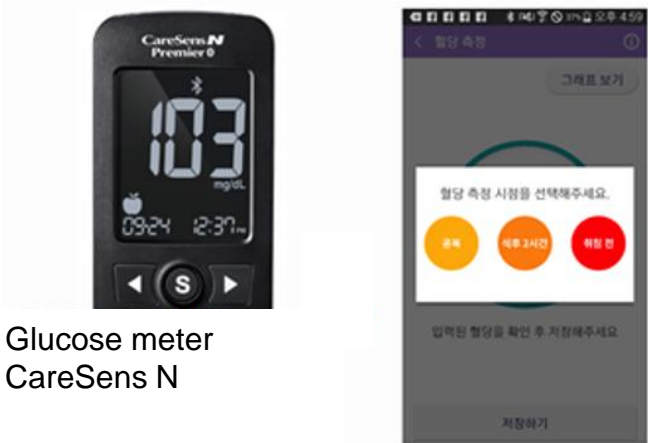

Glucose meter  
CareSens N
