# Supplementary material for: Remote Management of Poststroke Patients With a Smartphone-Based Management System Integrated in Clinical Care: Prospective, Nonrandomized, Interventional Study
Source: PubMed Central journal article supplement (PMC7068458; doi:10.2196/15377), 2020-02-27
Supplement: jmir_v22i2e15377_app2.pdf [file jmir_v22i2e15377_app2.pdf]

**Multimedia appendix 2.** Clinical assessment of outcomes in this study

| Clinical outcomes                 | Purpose                             | Description                                                                                                                                     |
|-----------------------------------|-------------------------------------|-------------------------------------------------------------------------------------------------------------------------------------------------|
| Stroke awareness score (total, %) | Awareness of stroke                 | Percentage scores of questionnaire (4 parts: definition of stroke, risk factors of stroke, treatment of stroke, and action plan against stroke) |
| Beck's depression inventory (BDI) | Depression scale                    | Self-questionnaire                                                                                                                              |
| EuroQol-5 Dimensions (EQ-5D)      | Health-related quality of life      | Self-questionnaire                                                                                                                              |
| Physical measurements             | Objectives related with stroke risk | Systolic blood pressure, diastolic blood pressure, body mass index, waist circumference                                                         |
