# Supplementary material for: Remote Management of Poststroke Patients With a Smartphone-Based Management System Integrated in Clinical Care: Prospective, Nonrandomized, Interventional Study
Source: PubMed Central journal article supplement (PMC7068458; doi:10.2196/15377), 2020-02-27
Supplement: jmir_v22i2e15377_app3.pdf [file jmir_v22i2e15377_app3.pdf]

**Multimedia appendix 3. Questionnaire of the stroke awareness score in English**

| Part 1. Definition of stroke (11 points)                                                                         | Answer |
|------------------------------------------------------------------------------------------------------------------|--------|
| 1. Have you ever heard of “stroke” before? (No point)                                                            | 1      |
| 1) Yes 2) No                                                                                                     |        |
| 2. Which kind of disease do you think is “stroke”? (1 point)                                                     | 2      |
| 1) Aging and degenerative disease of brain                                                                       |        |
| 2) Vascular disease of brain                                                                                     |        |
| 3) Convulsive disease of brain                                                                                   |        |
| 4) Heart disease                                                                                                 |        |
| 5) Neural or muscle disease of arms and legs                                                                     |        |
| 6) I don’t know                                                                                                  |        |
| 3. Please choose the symptom of stroke. (Each question has an answer.)<br>(10 points, 1 point for each question) |        |
| (1) 1) Paralysis of one side of arm and leg 2) stiffness in neck                                                 | 1      |
| (2) 1) Chest pain 2) language problem (words do not come out or do not understand other’s words)                 | 2      |
| (3) 1) hand tremble 2) loss of sense in one side of body                                                         | 2      |
| (4) 1) diplopia (an object seen like two) 2) tinnitus (ears ringing)                                             | 1      |
| (5) 1) visual problem (one side of scene is not seen) 2) eyelid tremble                                          | 1      |
| (6) 1) back pain 2) articular problem (cannot pronounce clearly)                                                 | 2      |
| (7) 1) Facial paralysis 2) All hands and feet numbness                                                           | 1      |
| (8) 1) consciousness problem 2) breathing problem                                                                | 1      |
| (9) 1) dry eye 2) gait difficulty                                                                                | 2      |
| (10) 1) visual loss in one eye 2) cold sweat                                                                     | 1      |

---

Part 2. Risk factors of stroke (10 points)

---

4. Please choose 10 risk factors of stroke. (10 points, 1 point each) 1, 2, 3, 5,  
1) smoking 2) binge drinking 3) hypertension 7, 8, 9,  
4) stress 5) high cholesterol 6) low economic status 10, 11, 13  
7) obesity 8) physical inactive 9) family history of stroke  
10) diabetes 11) old age 12) contraceptive medicine  
13) heart disease including arrhythmia 14) liver disease 15) kidney  
disease
5. Have you ever heard of “thrombolysis treatment” which is the way of 1  
treatment for acute phase of ischemic stroke (brain infarction)? (5  
points)  
1) Yes (go to 5-1)  
2) No (go to 6)

Part 3. Treatment of stroke (8 points)

- 5-1. When you can have “thrombolysis treatment”? (1 point) 2  
1) If you only go to a big hospital  
2) If you go to hospital right away when you feel symptoms  
3) If oriental medicine treatment is not effective  
4) Whenever if you are diagnosed as a stroke  
5) I don't know
6. Does stroke recur well? (1 point) 1  
1) Yes 2) No 3) I don't know
7. When do you have to take medicine if you are diagnosed as stroke? (1 4  
point)

- 1) During admission
- 2) During symptoms relieving
- 3) During 1 year regardless of symptoms
- 4) During life regardless of symptoms

Part 4. Action plan against stroke

8. What will you do when symptoms of stroke occur? 4
    - 1) Visit a general hospital
    - 2) Wait until the symptom got better
    - 3) Visit an oriental medicine clinic or oriental medicine hospital
    - 4) Call 911 and am ambulance
    - 5) Visit a hospital where you visited before
  9. Which do you think beneficial folk remedies for stroke before arriving at a hospital? 6
    - 1) Stab hands or feet with a needle
    - 2) Take an oriental medicine (Cheongshimhwan)
    - 3) Take medicines previously described
    - 4) Massage paralyzed arm and leg
    - 5) Eat a meal
    - 6) No helpful remedies
-
