# Supplementary material for: Remote Management of Poststroke Patients With a Smartphone-Based Management System Integrated in Clinical Care: Prospective, Nonrandomized, Interventional Study
Source: PubMed Central journal article supplement (PMC7068458; doi:10.2196/15377), 2020-02-27
Supplement: jmir_v22i2e15377_app4.pdf [file jmir_v22i2e15377_app4.pdf]

**Multimedia appendix 4.** Demographic characteristics and clinical information of study participants

---

|                          | All participants (n=99) |
|--------------------------|-------------------------|
| Sex                      |                         |
| Male                     | 60 (61%)                |
| Female                   | 39 (39%)                |
| Age                      | 57.9 ± 10.8             |
| Stroke subtype           |                         |
| Ischemic                 | 61 (62%)                |
| Hemorrhagic              | 38 (38%)                |
| Intracerebral            | 30 (30%)                |
| Subarachnoid             | 8 (8%)                  |
| Clinical information     |                         |
| Height                   | 163.6 ± 8.8             |
| Weight                   | 66.0 ± 10.9             |
| Body mass index          | 24.7 ± 3.1              |
| Waist circumference      | 66.0 ± 10.9             |
| Hypertension             | 71 (72%)                |
| Diabetes mellitus        | 20 (20%)                |
| Dyslipidemia             | 32 (32%)                |
| Vital signs              |                         |
| Systolic blood pressure  | 125.0 ± 17.5            |
| Diastolic blood pressure | 82.3 ± 9.8              |
| Heart rate               | 74.0 ± 11.8             |

---

<sup>a</sup> Continuous variables were described as mean ± 1 standard deviation (1SD).
