# Supplementary material for: Remote Management of Poststroke Patients With a Smartphone-Based Management System Integrated in Clinical Care: Prospective, Nonrandomized, Interventional Study
Source: PubMed Central journal article supplement (PMC7068458; doi:10.2196/15377), 2020-02-27
Supplement: jmir_v22i2e15377_app5.pdf [file jmir_v22i2e15377_app5.pdf]

**Multimedia appendix 5.** Changes in the total stroke awareness score and the scores of each part using smartphone-based management system

| Main outcomes                            | Visit 1<br>(0 week) | Visit 2<br>(4 weeks) | Visit 3<br>(12 weeks) | Visit 2-Visit 1 |         | Visit 3- Visit 1 |         | SE   |
|------------------------------------------|---------------------|----------------------|-----------------------|-----------------|---------|------------------|---------|------|
|                                          |                     |                      |                       | Value           | P-value | Value            | P-value |      |
| Stroke awareness score (total, %)        | 59.6 ± 18.1         | 67.6 ± 16.0          | 74.7 ± 14.0           | 7.98            | <.001   | 15.12            | <.001   | 1.30 |
| Scores of each part                      |                     |                      |                       |                 |         |                  |         |      |
| Definition and symptoms<br>of stroke (%) | 74.3 ± 17.8         | 76.8 ± 18.7          | 78.8 ± 16.3           | 2.48            | .13     | 4.50             | .0066   | 1.64 |
| Risk factors of stroke (%)               | 52.5 ± 26.8         | 64.2 ± 23.1          | 74.6 ± 24.0           | 11.72           | <.001   | 22.12            | <.001   | 2.62 |
| Treatment of stroke (%)                  | 52.4 ± 38.7         | 63.3 ± 34.8          | 75.1 ± 29.9           | 10.86           | .0010   | 22.73            | <.001   | 3.25 |
| Immediate actions<br>against stroke (%)  | 42.9 ± 37.1         | 51.0 ± 36.3          | 51.0 ± 35.7           | 8.08            | .034    | 8.08             | .034    | 3.79 |

<sup>a</sup> Scores were described as mean ± 1standard deviation (1SD). Abbreviation: SE (Standard Error)

<sup>b</sup> Scores of visit 1 was compared with scores of visit 2 and visit 3 with repeated measure analysis of variance (RM-ANOVA)
