# Supplementary material for: Remote Management of Poststroke Patients With a Smartphone-Based Management System Integrated in Clinical Care: Prospective, Nonrandomized, Interventional Study
Source: PubMed Central journal article supplement (PMC7068458; doi:10.2196/15377), 2020-02-27
Supplement: jmir_v22i2e15377_app6.pdf [file jmir_v22i2e15377_app6.pdf]

**Multimedia appendix 6.** Changes in Beck’s depression inventory (BDI) scores among patients who were depressed and not depressed, and in the EuroQol-5 Dimensions (EQ-5D) scores

| Main outcomes                | Visit 1<br>(0 week) | Visit 2<br>(4 weeks) | Visit 3<br>(12 weeks) | Visit 2-Visit 1 |         | Visit 3- Visit 1 |         | SE    |
|------------------------------|---------------------|----------------------|-----------------------|-----------------|---------|------------------|---------|-------|
|                              |                     |                      |                       | Value           | P-value | Value            | P-value |       |
| BDI                          | 12.7 ± 10.1         | 11.2 ± 10.2          | 10.7 ± 10.2           | -1.57           | .011    | -2.07            | <.001   | 0.61  |
| BDI, depressed (n=40)        | 23.2 ± 6.6          | 19.8 ± 8.8           | 19.6 ± 9.1            | -3.35           | .0028   | -3.63            | .0013   | 1.08  |
| BDI, not depressed<br>(n=59) | 5.6 ± 4.2           | 5.3 ± 6.0            | 4.6 ± 5.1             | -0.36           | .61     | -1.02            | .15     | 0.69  |
| EQ-5D                        | 0.66 ± 0.33         | 0.69 ± 0.34          | 0.69 ± 0.34           | 0.025           | .21     | 0.029            | .14     | 0.020 |

<sup>a</sup> Percent scores were described as mean ± 1 standard deviation (1SD). Abbreviation: SE (Standard Error).

<sup>b</sup> Scores of visit 1 was compared with scores of visit 2 and visit 3 with repeated measure analysis of variance (RM-ANOVA).
