# Supplementary material for: Remote Management of Poststroke Patients With a Smartphone-Based Management System Integrated in Clinical Care: Prospective, Nonrandomized, Interventional Study
Source: PubMed Central journal article supplement (PMC7068458; doi:10.2196/15377), 2020-02-27
Supplement: jmir_v22i2e15377_app7.pdf [file jmir_v22i2e15377_app7.pdf]

**Multimedia appendix 7.** Changes in blood pressure, body mass index and waist circumference

| Main outcomes          | Visit 1<br>(0 week) | Visit 2<br>(4 weeks) | Visit 3<br>(12 weeks) |
|------------------------|---------------------|----------------------|-----------------------|
| Uncontrolled BP (n=26) |                     |                      |                       |
| SBP, mmHg              | 145.5 ± 15.6        | 134.2 ± 16.0         | 131.5 ± 12.4          |
| DBP, mmHg              | 91.3 ± 8.6          | 84.6 ± 9.7           | 85.2 ± 8.5            |
| Normal BP (n=73)       |                     |                      |                       |
| SBP, mmHg              | 117.7 ± 11.4        | 122.2 ± 12.8         | 123.3 ± 14.3          |
| DBP, mmHg              | 79.0 ± 8.0          | 79.9 ± 8.7           | 80.3 ± 9.7            |
| Total BP (n=99)        |                     |                      |                       |
| SBP, mmHg              | 125.0 ± 17.5        | 125.4 ± 14.6         | 125.5 ± 14.3          |
| DBP, mmHg              | 82.3 ± 9.8          | 81.1 ± 9.2           | 81.6 ± 9.6            |
| BMI                    | 24.7 ± 3.1          | 24.7 ± 3.1           | 24.7 ± 3.1            |
| Waist circumference    | 91.6 ± 7.6          | 92.0 ± 7.8           | 92.2 ± 7.6            |

| Main outcomes             | Visit 2-Visit 1 |         | Visit 3- Visit 1 |         | SE   |
|---------------------------|-----------------|---------|------------------|---------|------|
|                           | Value           | P-value | Value            | P-value |      |
| Uncontrolled BP<br>(n=26) |                 |         |                  |         |      |
| SBP, mmHg                 | -11.27          | .0010   | -13.92           | <.001   | 3.21 |
| DBP, mmHg                 | -6.73           | <.001   | -6.19            | <.001   | 1.60 |
| Normal BP (n=73)          |                 |         |                  |         |      |
| SBP, mmHg                 | 4.49            | .013    | 5.58             | .0021   | 1.78 |
| DBP, mmHg                 | 0.84            | .45     | 1.29             | .25     | 1.10 |
| Total BP (n=99)           |                 |         |                  |         |      |
| SBP, mmHg                 | 0.35            | .83     | 0.45             | .79     | 1.68 |

|                        |       |     |       |     |       |
|------------------------|-------|-----|-------|-----|-------|
| DBP, mmHg              | -1.15 | .23 | -0.68 | .95 | 0.48  |
| BMI                    | 0.060 | .43 | 0.014 | .85 | 0.076 |
| Waist<br>circumference | 0.13  | .37 | 0.15  | .32 | 0.15  |

---

<sup>a</sup> Percent scores were described as mean  $\pm$  1 standard deviation (1SD). Abbreviation: BP (blood pressure), SE (Standard Error).

<sup>b</sup> Scores of visit 1 was compared with scores of visit 2 and visit 3 with repeated measure analysis of variance (RM-ANOVA).
